# Supplementary material for: Antimicrobial and antiviral evaluation of compounds from Holoptelea integrifolia: in silico supported in vitro study
Source: Royal Society of Chemistry journal article supplement (doi:10.1039/d3ra05978b), 2023-01-01
Supplement: d3ra05978b1.zip [file d3ra05978b1.zip]

**Supplementary Materials**

**Antimicrobial and Antiviral Evaluation of Compounds from *Holoptelea Integrifolia*: *in silico* supported *in vitro* study**

Hala Sh. Mohammeda*, Eman F.S. Tahab, Fatma S. Mahrous a, Rehab Sabourc

Marwa M. Abdel-Azizd, Lotfy D. Ismaile

**a** Department of Pharmacognosy and Medicinal Plants, Faculty of Pharmacy (Girls), Al-Azhar University, Cairo (11311), Egypt. **b** Department ofHealth Radiation Research, National Centre for Radiation Research and Technology, Egyptian Atomic Energy Authority (EAEA), Cairo, Egypt. **c**Department of Pharmaceutical Medicinal Chemistry and Drug Design, Faculty of Pharmacy (Girls), Al-Azhar University, Cairo, Egypt. **d** The Regional Centre for Mycology and Biotechnology, Al-Azhar University, Cairo, Egypt. e Department of Pharmacognosy and Medicinal Plants, Faculty of Pharmacy (Boys), Al-Azhar University, Cairo, Egypt.

*** Corresponding author:**

**Eman FS Taha; E-mail: emanfayezsaid@gmail.com**

**Eman.Fayez@eaea.org.eg**

**Appendix**

| Item | Subject |
| --- | --- |
| Fig. S1 | Negative HRESI-MS spectrum of DHS |
| Fig. S2 | 1H NMR spectrum of DHS in DMSO-*d6* |
| Fig. S3 | 13C NMR spectrum of DHS in DMSO-*d6* |
| Fig. S4 | DEPT-135 spectrum of DHS |
| Fig. S5 | HSQC spectrum of DHS |
| Fig. S6 | HMBC spectrum of DHS |
| Fig. S7 | The COSY spectrum of DHS |
| Fig. S8 | Positive HRESI-MS spectrum of EGG |
| Fig. S9 | 1H NMR spectrum of EGG in DMSO-*d6* |
| Fig. S10 | 13C NMR spectrum of EGG in DMSO-*d6* |
| Fig. S11 | Schematic representation of perceptive evaluation of passive gastrointestinal absorption (HIA) and Brain penetration (BBB) with molecules in the WLOGP-versus-TPSA using BOILED-Egg. |
| Fig. S12 | Schematic diagram of Bioavailability Radar for Drug likeness of metabolites |
| Table S1 | The docking scores and binding interactions of DHS, EGG, Ligand, and Acyclovir inside the active site of DNA polymerase |
| Table S2 | The docking scores and binding interactions of DHS, EGG, and Ciprofloxacin inside the active site of DNA gyrase |
| Table S3 | ADME parameters of DHS and EGG isolated from *H. intergrifolia* leaves. |
| Table S4 | Physicochemical properties based on Lipinski´s rule of five, TPSA, % ABS and several rotatable bonds. |
| Table S5 |  |


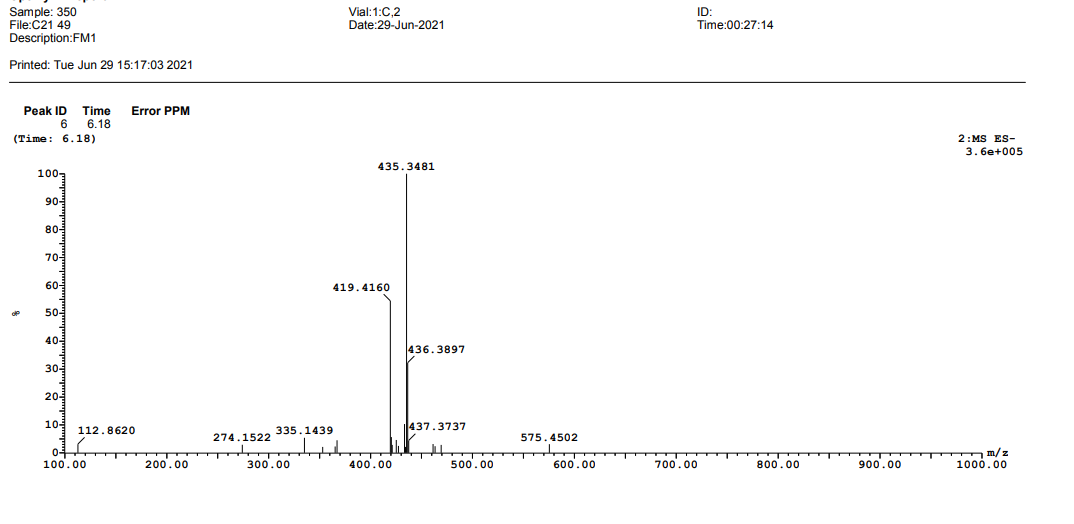
**Fig. S1, (5(6) dihydrostigmast 22en 3-O- β- glucopyranoside (DHS))**

**[M-H]-**

**Fig. S2, (5(6) dihydrostigmast 22en 3-O- β- glucopyranoside (DHS))**

**Fig. S3, (5(6) dihydrostigmast 22en 3-O- β- glucopyranoside (DHS))**

**Fig. S4, (5(6) dihydrostigmast 22en 3-O- β- glucopyranoside (DHS))**

**Fig. S5, (5(6) dihydrostigmast 22en 3-O- β- glucopyranoside (DHS))**


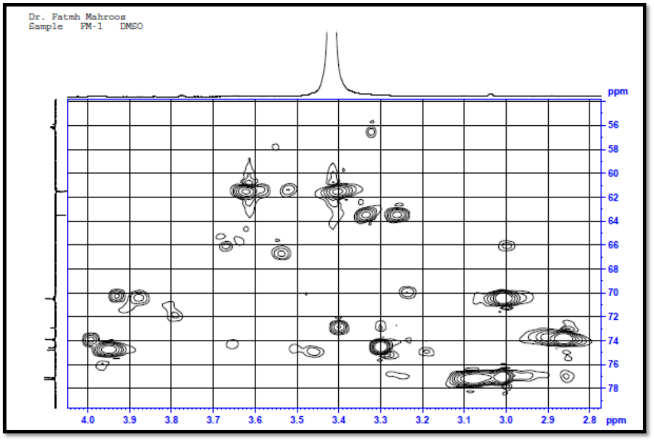


**Fig. S6, (5(6) dihydrostigmast 22en 3-*O- β*- glucopyranoside (DHS))**

**Fig. S7, (5(6) dihydrostigmast 22en 3-*O- β*- glucopyranoside (DHS))**

**Fig. S8, (1-*O*- Eicosanoyl glycerol- 2′- *O-β*-galacturonide (EGG))**


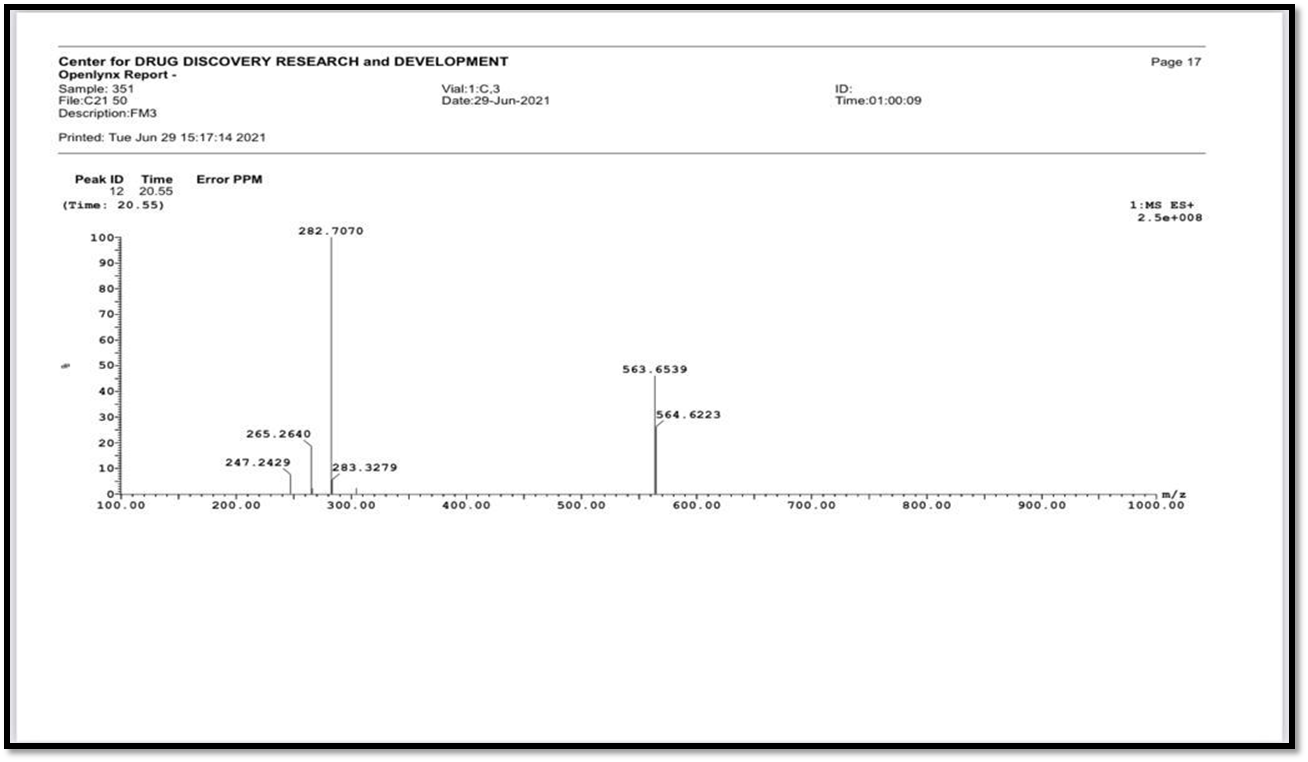


**[M+H]+**

**Fig. S9, (1-*O*- Eicosanoyl glycerol- 2′- *O*-*β*-galacturonide (EGG))**

**Fig. S10, (1-O- Eicosanoyl glycerol- 2′- O-β-galacturonide (EGG))**


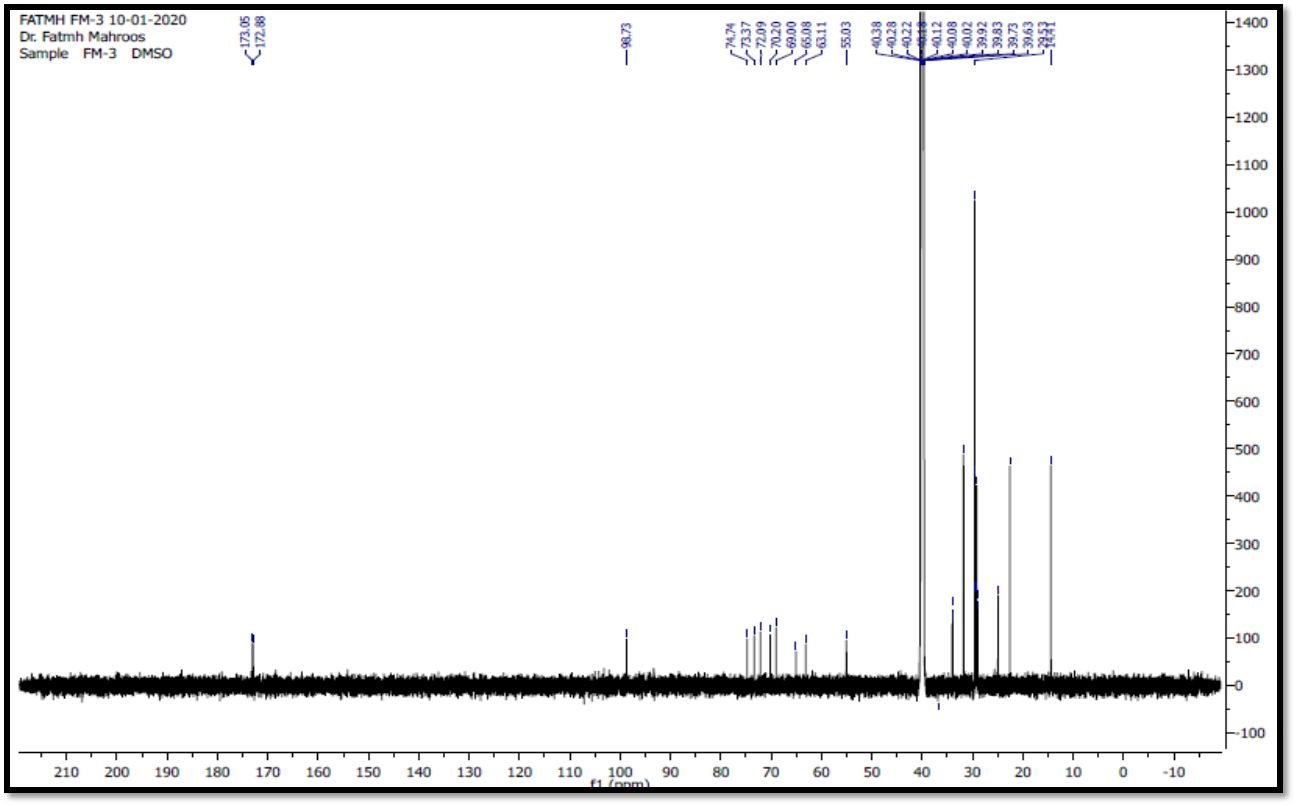


**Fig. S11**


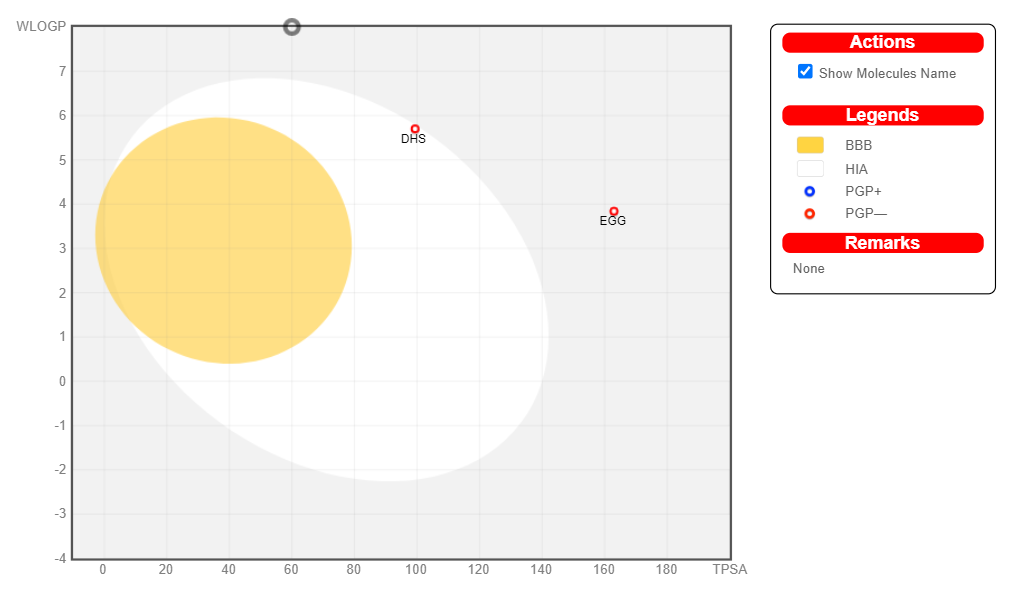
TPSR; Topological Polar Surface Area, Log Po/w (WLOGP); the logarithms of partition co-efficient and apparent partition co-efficient of drug candidates in a lipophilic phase such as octanol and a hydrophilic phase like water, Red Dots; are for metabolites predicted not be effulated with CNS by the P-glycoprotein**.**

**Fig. S12**

(Lipophilicity: -0.7 ˂ XLOGP3 ˂ +5.0, size: 150 ˂ MW ˂ 500 g/mol, polarity: 200A2 ˂ TPSA ˂ 1300A2, Insolubility: -6 ˂ log S (ESOL) ˂ 0, Instauration: 0.25 ˂ fraction C p3˂ 1, and flexibility: 0 ˂ Num. rotatable bonds ˂ 9)

**Table S1**. The docking scores and binding interactions of DHS, EGG, Ligand, and Acyclovir inside the active site of DNA polymerase

| Compound | | Docking score (Kcal/mol) | Interacting amino acids | Type of interactions |
| --- | --- | --- | --- | --- |
| DHS | | **-7.172** | Lys811  Cys814  Asn815  Ser720 | H- bond  H- bond  H- bond  H- bond |
| EGG | | **-5.776** | Ala719  Ser720  Arg785  Lys786  Glu925 | H- bond  H- bond  Hydrophobic  Hydrophobic  Hydrophobic |
| Ligand |  | **-6.982** | Ala719 H- bond  Arg785 H- bond  Lys811 H- bond  Glu927 C-H bond | |
| Acyclovir |  | **-6.522** | Lys811 H- bond  Asn815 H- bond | |

**Table S2:** The docking scores and binding interactions of DHS, EGG, and Ciprofloxacin inside the active site of DNA gyrase

| Metabolite | | Docking score (Kcal/mol) | Interacting amino acids | Type of interactions |
| --- | --- | --- | --- | --- |
| DHS | | **-7.642** | Asp510  His1081  Tyr580  Lys581  Tyr1150  Asp1151  Asn1153 | H- bond  C-H bond  Hydrophobic  Hydrophobic  Hydrophobic  Hydrophobic  Hydrophobic |
| EGG | | **-4.561** | Asp510  Asp512  Arg1033  Gly1082 | H- bond  H- bond  H- bond  H- bond |
| Ciprofloxacin |  | **-8.242** | Arg1033 H- bond  His1081 H- bond  Asp510 Hydrophobic  Tyr580 Hydrophobic  Tyr1150 Hydrophobic | |

**Table S3:** ADME parameters of DHS and EGG isolated from *H. intergrifolia* leaves.

- **Physicochemical Properties**

|  | DHS | EGG |
| --- | --- | --- |
| Conical smiles | CC[C@@H](C(C)C)/C=C/[C@H]([C@H]1CC[C@@H]2[C@]1(C)CC[C@H]1[C@H]2CCC2[C@]1(C)CC[C@@H](C2)O[C@@H]1O[C@H](CO)[C@H](C([C@H]1O)O)O)C | CCCCCCCCCCCCCCCCCCCC(=O)OCC(O[C@@H]1O[C@H](C(=O)O)[C@H](C([C@H]1O)O)O)CO |
| Formula | C35H60O6 | C29H54O10 |
| M.W. | 576.85 | 562.73 |
| Heavy metals | 41 | 39 |
| Aromatic heavy atoms | 0 | 0 |
| Fraction Csp3 | 0.94 | 0.93 |
| Rotatable bonds | 8 | 25 |
| H-bond acceptors | 6 | 10 |
| H-bond donors | 4 | 5 |
| MR (Molar refractivity) | 165.61 | 149.28 |
| TPSA (0A2) | 99.38 | 162.98 |

**Lipinski (Pfizer):** M.W.≤ 500, H-bond acceptors (O, N) ≤10, H-bond donors (OH, NH) ≤ 5, TPSA;(topological polar surface area) ≤140 0A2, Rotatable bonds≤10.

- **Lipophilicity characteristics**

| Log *P*o/w | DHS | EGG |
| --- | --- | --- |
| iLOGP | 5.63 | 4.25 |
| XLOGP3 | 7.79 | 6.96 |
| WLOGP | 5.7 | 3.84 |
| MLOGP | 3.96 | 1.22 |
| Silicos-IT Log P | 4.85 | 5 |
| Consensus Log P | 5.59 | 4.26 |

Lipinski (Pfizer): MLOGP ≤ 4.15

- **Pharmacokinetics parameters**

|  | DHS | EGG |
| --- | --- | --- |
| GI absorption | High | low |
| BBB permeant | No | No |
| Pgp substrate | No | No |
| CYP1A2 inhibitor | No | No |
| CYP2C19 inhibitor | No | Yes |
| CYP2D6 inhibitor | No | No |
| log Kp (Skin permeation) | -4.29 cm/s | -4.79 cm/s |

- **Water Solubility characteristics**

|  | DHS | EGG |
| --- | --- | --- |
| ESOL | | |
| Log S | -7.8 | -6.06 |
| Solubility | 9.22e-06 mg/mL 1.60e-08 mol/l | 4.86e-04 mg/mL 8.63e-07 mol/l |
| Class | Poorly soluble | Poorly soluble |
| Ali | | |
| Log S | -9.72 | -10.2 |
| Solubility | 1.09e-07 mg/mL 1.90e-10 mol/l | 3.58e-08 mg/mL 6.37e-11 mol/l |
| Class | Poorly soluble | Insoluble |
| Silicos-IT | | |
| Log S | -3.7 | -4.64 |
| Solubility | 1.15e-01 mg/mL 1.99e-04 mol/l | 1.30e-02 mg/mL 2.30e-05 mol/l |
| Class | Soluble | Moderately soluble |

- **Drug likeness rule and Bioavailability score**

|  | DHS | EGG |
| --- | --- | --- |
| Lipinski | Yes; 1 violation: MW>500 | Yes; 1 violation: MW>500 |
| Ghose | No;4violations:MW>480, WLOGP>5.6, MR>130, #atoms>70 | No; 3 violations: MW>480, MR>130, #atoms>70 |
| Veber | Yes | No; 2violations: Rotors>10, TPSA>140 |
| Egan | Yes | No; 1 violation: TPSA>131.6 |
| Muegge | No; 1 violation: XLOGP3>5 | No;3violations: XLOGP3>5,TPSA>150, Rotors>15 |
| Bioavailability Score | 0.55 | 0.11 |

- **Medicinal Chemistry properties**

|  | DHS | EGG |
| --- | --- | --- |
| PAINS | 0 alert | 0 alert |
| Brenk | 2 alerts: isolated_alkene,  saponine_derivative | 0 alert |
| Leadlikeness | No; 3 violations: MW>350, Rotors >7, XLOGP3>3.5 | No; 3 violations: MW>350, Rotors>7, XLOGP3>3.5 |
| Synthetic Accessibility | 7.84 | 6.78 |

**Table S4:** Physicochemical properties based on Lipinski´s rule of five, TPSA, % ABS and several rotatable bonds.

| Comp. No. | HBD | HBA | MLogP | MW | Lipinski´s Violations | TPSA | % ABS | No. of  Rot. bonds |
| --- | --- | --- | --- | --- | --- | --- | --- | --- |
| DHS | 4 | 6 | 3.96 | 576.85 | 1 | 99.38 | 74.7 | 8 |
| EGG | 5 | 10 | 1.22 | 562.73 | 1 | 162.98 | 52.7 | 25 |
